# Supplementary material for: Peptidoglycan biosynthesis is driven by lipid transfer along enzyme-substrate affinity gradients
Source: PubMed Central journal article supplement (PMC9046198; doi:10.1038/s41467-022-29836-x), 2022-04-27
Supplement: 41467_2022_29836_MOESM3_ESM.pdf [file 41467_2022_29836_MOESM3_ESM.pdf]

## Reporting Summary

Nature Research wishes to improve the reproducibility of the work that we publish. This form provides structure for consistency and transparency in reporting. For further information on Nature Research policies, see our [Editorial Policies](#) and the [Editorial Policy Checklist](#).

### Statistics

For all statistical analyses, confirm that the following items are present in the figure legend, table legend, main text, or Methods section.

n/a Confirmed

- The exact sample size ( $n$ ) for each experimental group/condition, given as a discrete number and unit of measurement
- A statement on whether measurements were taken from distinct samples or whether the same sample was measured repeatedly
- The statistical test(s) used AND whether they are one- or two-sided  
*Only common tests should be described solely by name; describe more complex techniques in the Methods section.*
- A description of all covariates tested
- A description of any assumptions or corrections, such as tests of normality and adjustment for multiple comparisons
- A full description of the statistical parameters including central tendency (e.g. means) or other basic estimates (e.g. regression coefficient) AND variation (e.g. standard deviation) or associated estimates of uncertainty (e.g. confidence intervals)
- For null hypothesis testing, the test statistic (e.g.  $F$ ,  $t$ ,  $r$ ) with confidence intervals, effect sizes, degrees of freedom and  $P$  value noted  
*Give  $P$  values as exact values whenever suitable.*
- For Bayesian analysis, information on the choice of priors and Markov chain Monte Carlo settings
- For hierarchical and complex designs, identification of the appropriate level for tests and full reporting of outcomes
- Estimates of effect sizes (e.g. Cohen's  $d$ , Pearson's  $r$ ), indicating how they were calculated

*Our web collection on [statistics for biologists](#) contains articles on many of the points above.*

### Software and code

Policy information about [availability of computer code](#)

Data collection

Native mass spectrometry data were acquired on a Q Exactive Hybrid Quadrupole mass spectrometer (Thermo Scientific)

Data analysis

Qual Browser Thermo Xcalibur 4.1.31.9  
UNIDEC 4.1  
GraphPad Prism9.3.1  
Origin2021b (OriginLab)  
PyLipID (<https://github.com/wlsong/PyLipID>)  
CG2AT2 (<https://github.com/owenvickery/cg2at> and <https://zenodo.org/record/3890164>)  
Gromacs 2020  
CHARMM-GUI

For manuscripts utilizing custom algorithms or software that are central to the research but not yet described in published literature, software must be made available to editors and reviewers. We strongly encourage code deposition in a community repository (e.g. GitHub). See the Nature Research [guidelines for submitting code & software](#) for further information.

## Data

Policy information about [availability of data](#)

All manuscripts must include a [data availability statement](#). This statement should provide the following information, where applicable:

- Accession codes, unique identifiers, or web links for publicly available datasets
- A list of figures that have associated raw data
- A description of any restrictions on data availability

Raw mass spectrometry data and MD parameter files are freely available at figshare via <https://doi.org/10.6084/m9.figshare.19403852.v2>  
 The MD simulations made use of the atomic coordinate files of Mray (PDB code: 5CKR, [doi.org/10.2210/pdb5CKR/pdb](https://doi.org/10.2210/pdb5CKR/pdb)) and of MurG (PDB code: 1NLM, [doi.org/10.2210/pdb1NLM/pdb](https://doi.org/10.2210/pdb1NLM/pdb))

## Field-specific reporting

Please select the one below that is the best fit for your research. If you are not sure, read the appropriate sections before making your selection.

- Life sciences       Behavioural & social sciences       Ecological, evolutionary & environmental sciences

For a reference copy of the document with all sections, see [nature.com/documents/nr-reporting-summary-flat.pdf](https://nature.com/documents/nr-reporting-summary-flat.pdf)

## Life sciences study design

All studies must disclose on these points even when the disclosure is negative.

|                 |                                                                                                                                                                                                                                                                                                    |
|-----------------|----------------------------------------------------------------------------------------------------------------------------------------------------------------------------------------------------------------------------------------------------------------------------------------------------|
| Sample size     | No sample size determination was needed. The number of independent measurements performed was determined based on the level of variability within the replicates and experience with the mass spectrometry technique.                                                                              |
| Data exclusions | No data exclusion was needed.                                                                                                                                                                                                                                                                      |
| Replication     | Each measurements was replicated 3 times. All attempts at replications were successful and a representative spectrum of each sample was displayed in all cases. In the case of mutagenesis, proteins were expressed and purified in parallel for 3 times, starting from freshly transformed cells. |
| Randomization   | This is not relevant to our study because no grouping was required.                                                                                                                                                                                                                                |
| Blinding        | No blinding was applicable to this study because data acquisition was performed by unbiased instrument.                                                                                                                                                                                            |

## Reporting for specific materials, systems and methods

We require information from authors about some types of materials, experimental systems and methods used in many studies. Here, indicate whether each material, system or method listed is relevant to your study. If you are not sure if a list item applies to your research, read the appropriate section before selecting a response.

| Materials & experimental systems    |                                                        | Methods                             |                                                 |
|-------------------------------------|--------------------------------------------------------|-------------------------------------|-------------------------------------------------|
| n/a                                 | Involved in the study                                  | n/a                                 | Involved in the study                           |
| <input checked="" type="checkbox"/> | <input type="checkbox"/> Antibodies                    | <input checked="" type="checkbox"/> | <input type="checkbox"/> ChIP-seq               |
| <input checked="" type="checkbox"/> | <input type="checkbox"/> Eukaryotic cell lines         | <input checked="" type="checkbox"/> | <input type="checkbox"/> Flow cytometry         |
| <input checked="" type="checkbox"/> | <input type="checkbox"/> Palaeontology and archaeology | <input checked="" type="checkbox"/> | <input type="checkbox"/> MRI-based neuroimaging |
| <input checked="" type="checkbox"/> | <input type="checkbox"/> Animals and other organisms   |                                     |                                                 |
| <input checked="" type="checkbox"/> | <input type="checkbox"/> Human research participants   |                                     |                                                 |
| <input checked="" type="checkbox"/> | <input type="checkbox"/> Clinical data                 |                                     |                                                 |
| <input checked="" type="checkbox"/> | <input type="checkbox"/> Dual use research of concern  |                                     |                                                 |
